# Supplementary material for: Segregation of Benzoic Acid in Polymer Crystalline Cavities
Source: MDPI journal article supplement (doi:10.3390/polym15010177), 2022-12-30
Supplement: s1 [file s1]

## Article

# Segregation of benzoic acid in polymer crystalline cavities

Antonietta Cozzolino, Guglielmo Monaco, Paola Rizzo\* and Gaetano Guerra\*

Dipartimento di Chimica e Biologia “A. Zambelli” and INSTM Research Unit, Università degli Studi di Salerno, Via Giovanni Paolo II, 13284084 Fisciano, Italy

\* Correspondence: prizzo@unisa.it (P.R.); gguerra@unisa.it (G.G.)

## SUPPORTING INFORMATION

### Fits of infrared spectra

A quantitative evaluation of the relative amount of isolated and hydrogen-bonded guest molecules in all sPS films have been performed. In particular, the molar ratio of acid absorbed as monomer and dimer,  $r_{\text{mon}} = \frac{n_{\text{mon}}}{2n_{\text{dim}}}$ , has been estimated from the ratio of integrated absorbances of the peaks at 1738 and 1695  $\text{cm}^{-1}$  and the DFT-derived ratio of molar extinction, according to the following formula:

$$r_{\text{mon}} = \frac{\frac{1}{2} \frac{\epsilon_{1695}}{\epsilon_{1738}} \left( I_{1738}^{h+\text{BA}} - I_{1748}^h \frac{I_{1601}^{h+\text{BA}}}{I_{1601}^h} \right)}{I_{1695}^{h+\text{BA}}} \quad (\text{S1})$$

**Citation:** Cozzolino, A.; Monaco, G.; Rizzo, P.; Guerra, G. Segregation of Benzoic Acid in Polymer Crystalline Cavities. *Polymers* **2023**, *15*, 177. <https://doi.org/10.3390/polym15010177>

Academic Editor: Francesco Paolo La Mantia

Received: 29 November 2022

Revised: 15 December 2022

Accepted: 26 December 2022

Published: 30 December 2022

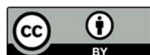

**Copyright:** © 2022 by the authors. Licensee MDPI, Basel, Switzerland. This article is an open access article distributed under the terms and conditions of the Creative Commons Attribution (CC BY) license (<https://creativecommons.org/licenses/by/4.0/>).

where the superscript h stands for the crystalline host. The molar fraction can be computed as  $x_{\text{mon}} = \frac{r_{\text{mon}}}{1+r_{\text{mon}}}$ . Equation S1 includes a correction for host absorption, as sPS has a small absorption at around 1748  $\text{cm}^{-1}$  which falls under the 1738  $\text{cm}^{-1}$  peak of the cocrystals; the correction must cope with the different widths of the films, estimated from the intensity of the conformationally insensitive 1601  $\text{cm}^{-1}$  peak.<sup>1</sup>

In the case of the epsilon sample with saturation of the signal at 1695  $\text{cm}^{-1}$ , the 664/632  $\text{cm}^{-1}$  pair of peaks was used instead. The molar absorption coefficients to be used in Eq. S1 have been estimated by gas-phase DFT computations. The results, gathered in Table S1 show that most of BA is adsorbed as dimer in the epsilon form, while comparable amounts of acid adsorbed as monomer or dimer are found in the delta form.

**Table S1:** Fitted central wavenumber and integrated areas  $I$  ( $\text{cm}^{-1}$ ) of the peaks used to quantify the fraction of acid adsorbed as monomer according to Eq. S1. Computed values, in columns 2 and 3, have been obtained as described in the Experimental Section. Computed frequencies have been scaled by 0.969 to partially compensate for anharmonicity.

| Sample                | $\tilde{\nu}_c$ ( $\text{cm}^{-1}$ ) | $\epsilon$ ( $\text{km mol}^{-1}$ ) | $\tilde{\nu}$ ( $\text{cm}^{-1}$ ) | $I$ ( $\text{cm}^{-1}$ ) | $r_{\text{mon}}$ | $x_{\text{mon}}$ |
|-----------------------|--------------------------------------|-------------------------------------|------------------------------------|--------------------------|------------------|------------------|
| CC sPS $\epsilon$ /BA | 1757.1                               | 396                                 | 1739.2                             | 14.85                    | --               | --               |
|                       | 1703.5                               | 1022                                | 1694.0                             | SAT                      |                  |                  |
|                       | 663.8                                | 39.6                                | 663.6                              | 8.90                     | 0.18             | 0.15             |
|                       | 620.1                                | 48.2                                | 632.2                              | 4.69                     |                  |                  |
|                       |                                      |                                     | 1601.9                             | 36.90                    |                  |                  |
| CC sPS $\delta$ /BA   |                                      |                                     | 1739.4                             | 23.79                    | 1.06             | 0.51             |
|                       |                                      |                                     | 1694.7                             | 26.67                    |                  |                  |
|                       |                                      |                                     | 664.9                              | 1.77                     | 0.67             | 0.40             |
|                       |                                      |                                     | 632.2                              | 2.86                     |                  |                  |
|                       |                                      |                                     | 1601.4                             | 26.64                    |                  |                  |
| sPS mesoform          |                                      |                                     | 1740.4                             | 3.10                     | 0.13             | 0.12             |
|                       |                                      |                                     | 1694.3                             | 29.64                    |                  |                  |
|                       |                                      |                                     | 664.1                              | 3.08                     | 0.07             | 0.07             |
|                       |                                      |                                     | 631.8                              | 0.52                     |                  |                  |
| NC sPS $\epsilon$     |                                      |                                     | 1748.4                             | 2.78                     |                  |                  |
|                       |                                      |                                     | 1601.6                             | 15.72                    |                  |                  |
| NC sPS $\delta$       |                                      |                                     | 1747.2                             | 3.30                     |                  |                  |
|                       |                                      |                                     | 1601.3                             | 17.85                    |                  |                  |

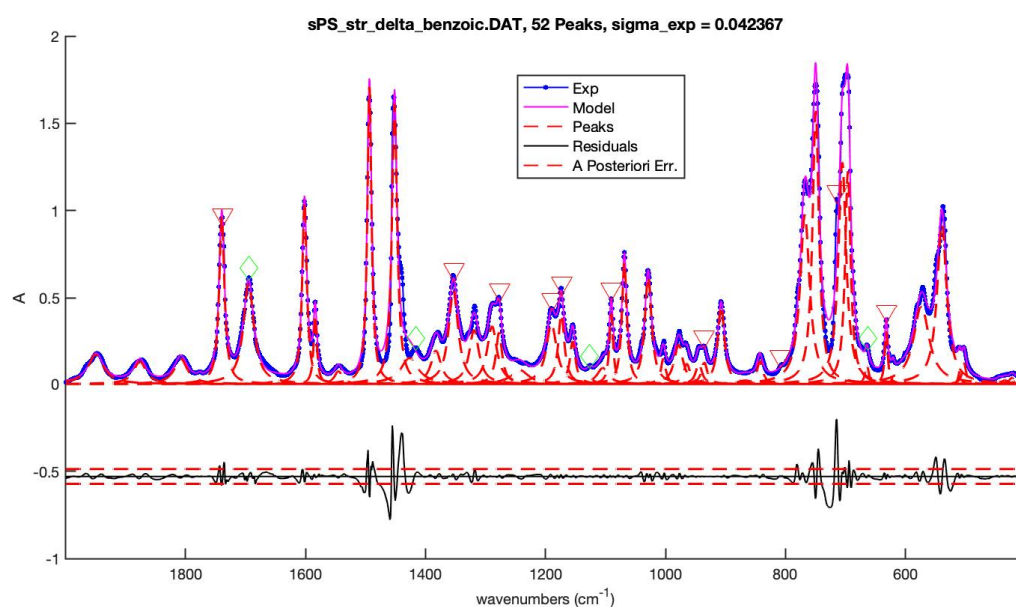

**Figure S1.** Portion of the spectrum of the CC sPS  $\delta$ /BA film, together with its fit in terms of sum of Lorentzians, the residuals on the bottom and the error levels. Peaks attributed to the monomer (dimer) of BA are marked with a red triangle (a green diamond).

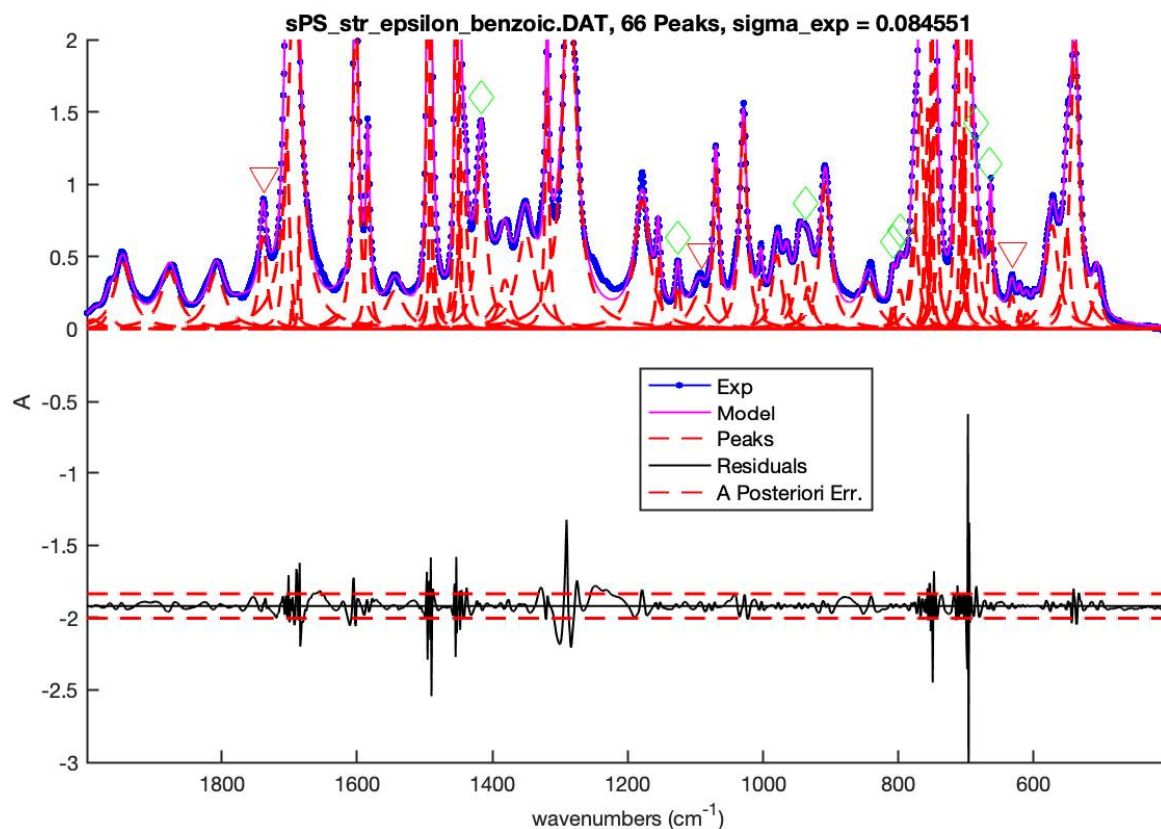

**Figure S2.** Portion of the spectrum of the CC sPS  $\epsilon$ /BA film, together with its fit in terms of sum of Lorentzians, the residuals on the bottom and the error levels. Peaks attributed to the monomer (dimer) of BA are marked with a red triangle (a green diamond).

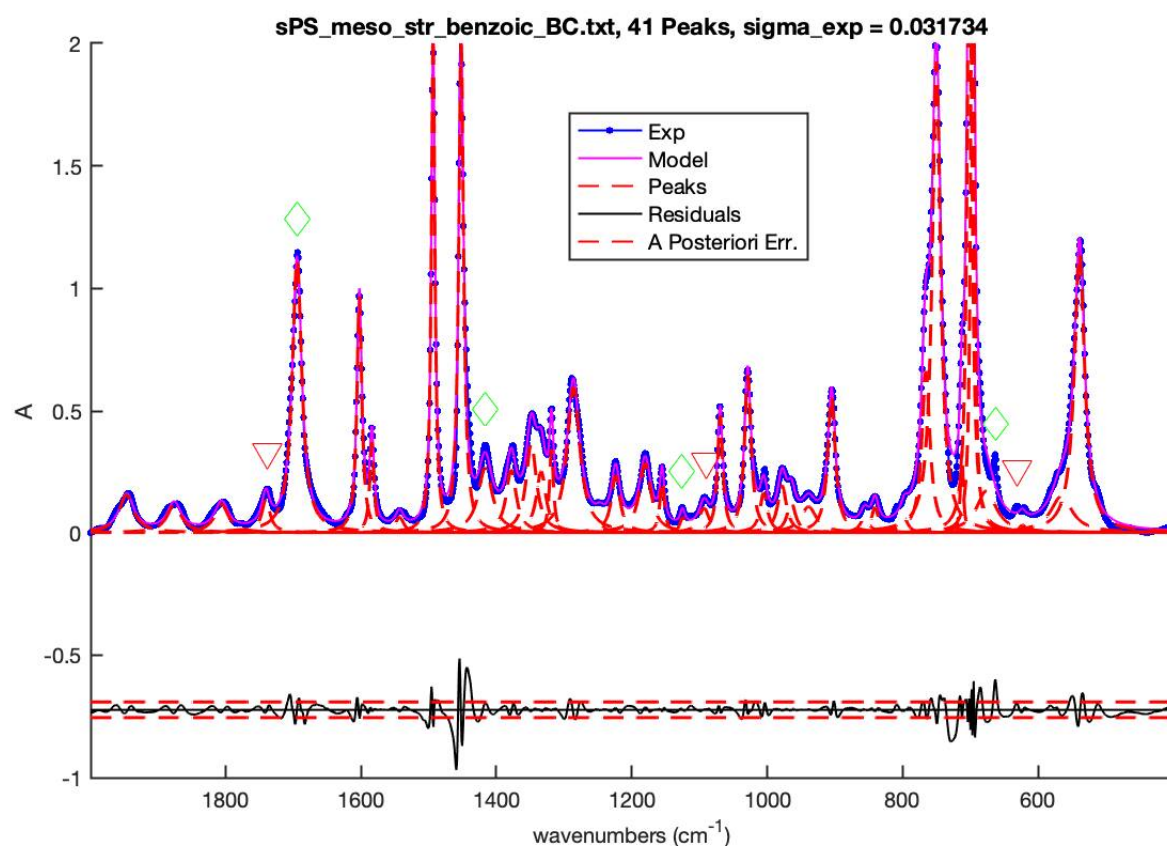

**Figure S3.** Portion of the spectrum of the sPS mesoform film, together with its fit in terms of sum of Lorentzians, the residuals on the bottom and the error levels. Peaks attributed to the monomer (dimer) of BA are marked with a red triangle (a green diamond).

**Disclaimer/Publisher's Note:** The statements, opinions and data contained in all publications are solely those of the individual author(s) and contributor(s) and not of MDPI and/or the editor(s). MDPI and/or the editor(s) disclaim responsibility for any injury to people or property resulting from any ideas, methods, instructions or products referred to in the content.
